# Supplementary material
Source: MDPI journal article supplement (https://www.mdpi.com/2227-9709/10/1/2)

## Supplementary

**File S1.** Questionnaire in English.

### *Instructions:*

My name is Alessandro Pinheiro. I am Science and Technology researcher at ISCTE – Lisbon University Institute, and I am carrying out a study about what the adults that play the FIFA game think and feel about the game while they are playing – under the supervision of Professor Abílio Oliveira and Professor Bráulio Alturas.

We hope you accept to participate in this research and answer the questions in the questionnaire, with your sincere and spontaneous opinions.

Your participation is voluntary, anonymous, and confidential.

The data obtained will be used, exclusively, for scientific purposes.

The estimated time is 12 min – but you can quit at any time if you want.

If you have 18 years or more, we thank you for participating in this study, voluntarily, by selecting the option below and proceeding to the next page.

Proceed

To proceed to the Questionnaire

Decline

To quit

### *Notes:*

1. This questionnaire is easiest to view on a laptop (portable) or desktop. Some details are less compatible with a smartphone.

2. If later, you want to know the results of this work, or have any additional comments, you can contact us: at [alessandro.pinheiro@iscte-iul.pt](mailto:alessandro.pinheiro@iscte-iul.pt)

To start, please indicate some data about yourself.

Q1: Please tick the box that corresponds to your gender

☐ Male ☐ Female ☐ I prefer not to say ☐ Others

Q2: Do you have any physical limitations?

☐ yes ☐ no ☐ maybe

Q3: Please inform your age

Q4: Please inform your level of education

Q5: Which edition of FIFA are you currently using and which edition was your first experience with the game?

Q6: Play online or offline, which is better? Why?

Q7: Which situation (s) most upset you when playing FIFA?

Q8: During or after playing a game in FIFA, did you ever feel unwell? If so, please describe it (please).

Q9: In the event of the feeling of being unwell, has this feeling already caused you to break something or an object? If yes, please describe (please).

Q10: During or after playing a game in FIFA, have you ever thought of aggressive behavior (with one or more people)? If so, how many times and how did it occur?

Q11: Read carefully and check the option that best suits your opinion of you: 'I consider myself a good player, because when the game allows, I have a good command, I know how to dribble, apply effect moves and I also have knowledge of various resources to seek the goal.'

☐ strongly disagree. ☐ Disagree. ☐ Neither agree nor disagree. ☐ I agree. ☐ I totally agree.

Q12: After playing several games online. I realized that the game's programming influences the gameplay. and most of the time I can already see when I'm going to win or lose.

☐ strongly disagree. ☐ Disagree. ☐ Neither agree nor disagree. ☐ I agree. ☐ I totally agree.

Q13: I was already very nervous about this game. but nowadays I no longer allow it to influence my emotions.

☐ strongly disagree. ☐ Disagree. ☐ Neither agree nor disagree. ☐ I agree. ☐ I totally agree.

Q14: During the Covid-19 pandemic. FIFA helped me to socialize online.

In nothing 1 — 2 — 3 — 4 — 5 Fully

Q15: During the Covid-19 pandemic. FIFA worsened my mood.

☐ strongly disagree. ☐ Disagree. ☐ Neither agree nor disagree. ☐ I agree. ☐ I totally agree.

Q16: During the Covid-19 pandemic. FIFA created social problems for me.

☐ strongly disagree. ☐ Disagree. ☐ Neither agree nor disagree. ☐ I agree. ☐ I totally agree.

Q17: During the Covid-19 pandemic. it is recommended not to play FIFA.

☐ strongly disagree. ☐ Disagree. ☐ Neither agree nor disagree. ☐ I agree. ☐ I totally agree.

Q18: If you want to make any considerations that you think are important. do so below.

**File S2.** Questionnaire in Portuguese.

*Instruções:*

Chamo-me Alessandro Pinheiro. sou investigador em Ciência e Tecnologia no ISCTE – Instituto Universitário de Lisboa. e estou a fazer um estudo sobre o que os adultos que jogam o FIFA pensam e sentem sobre o jogo enquanto jogam – sob a supervisão do professor Abílio Oliveira e do professor Bráulio Alturas.

Esperamos que aceite participar desta pesquisa e responda às perguntas do questionário. com suas opiniões sinceras e espontâneas.

Sua participação é voluntária. anônima e confidencial.

Os dados obtidos serão utilizados. exclusivamente. para fins científicos.

O tempo estimado é de 12 minutos – mas você pode desistir a qualquer momento se quiser.

Se você tem 18 anos ou mais. agradecemos por participar deste estudo. voluntariamente. selecionando a opção abaixo e passando para a próxima página.

Seguir

Para seguir para o questionário

Desistir

Para sair

*Notas:*

1. Este questionário é mais fácil de visualizar em um laptop (portátil) ou desktop. Alguns detalhes são menos compatíveis com um smartphone.

2. Se posteriormente quiser conhecer os resultados deste trabalho. ou tiver algum comentário adicional. pode contactar-nos: através do alessandro.pinho@iscte-iul.pt

Para começar. indique alguns dados sobre você.

Q1: Por favor. marque a caixa que corresponde ao seu gênero ☐ Masculino ☐ Feminino

☐ Prefiro não dizer ☐ Outros

Q2: Você tem alguma limitação física? ☐ sim ☐ não ☐ talvez

Q3: Informe sua idade

Q4: Por favor. informe seu nível de escolaridade

Q5: Qual a edição do FIFA você está usando atualmente e qual edição foi sua primeira experiência com o jogo?

Q6: Jogue online ou offline. qual é o melhor? Por quê?

Q7: Qual(is) situação(ões) mais te incomoda(m) ao jogar FIFA?

Q8: Durante ou depois de jogar o FIFA. você já se sentiu mal? Em caso afirmativo. descreva-o (por favor).

Q9: Em caso de sensação de mal-estar. essa sensação já o levou a quebrar alguma coisa ou objeto? Se sim. descreva (por favor).

Q10: Durante ou depois de jogar o FIFA. você já pensou em comportamento agressivo (com uma ou mais pessoas)? Se sim. quantas vezes e como ocorreu?

Q11: Leia com atenção e marque a opção que mais se adequa a sua opinião sobre você: 'Eu me considero um bom jogador. pois quando o jogo permite. tenho um bom domínio. sei driblar. aplicar jogadas de efeito e também tenho conhecimento de vários recursos para buscar a meta.'

☐ discordo fortemente. ☐ Discordo. ☐ Não concordo nem discordo. ☐ Eu concordo. ☐ Concordo totalmente.

Q12: Depois de jogar vários jogos online. percebi que a programação do jogo influencia na jogabilidade. e na maioria das vezes já consigo ver quando vou ganhar ou perder.

☐ discordo fortemente. ☐ Discordo. ☐ Não concordo nem discordo. ☐ Eu concordo. ☐ Concordo totalmente.

Q13: Eu já estava muito nervoso com esse jogo, mas hoje em dia não permito mais que ele influencie minhas emoções.

☐ discordo fortemente. ☐ Discordo. ☐ Não concordo nem discordo. ☐ Eu concordo. ☐ Concordo totalmente.

Q14: Durante a pandemia de Covid-19. a FIFA me ajudou a socializar online.

Em nada ☐ 1 ☐ 2 ☐ 3 ☐ 4 ☐ 5 Completamente

Q15: Durante a pandemia de Covid-19. o FIFA piorou meu humor. ☐ discordo forte

Q16: Durante a pandemia de Covid-19. o FIFA criou problemas sociais para mim.

☐ discordo fortemente. ☐ Discordo. ☐ Não concordo nem discordo. ☐ Eu concordo. ☐ Concordo totalmente.

Q17: Durante a pandemia de Covid-19. é recomendável não jogar FIFA.

☐ discordo fortemente. ☐ Discordo. ☐ Não concordo nem discordo. ☐ Eu concordo. ☐ Concordo totalmente.

Q18: Caso queira fazer alguma consideração que julgue importante. faça-o abaixo.

**Figure S1.** Portuguese word class.

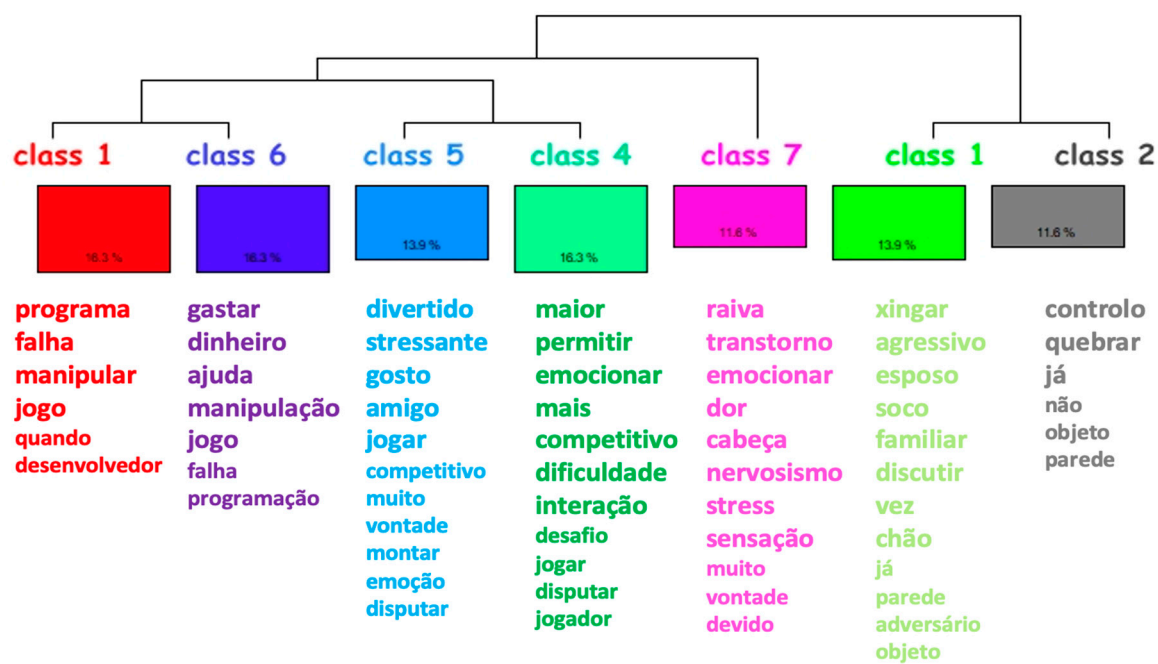

Supplement: s1 [file s1]
